# Supplementary material for: Assessment of Injury by Four Major Pests in Soybean Plants Using Hyperspectral Proximal Imaging
Source: MDPI journal article supplement (doi:10.3390/agronomy12071516), 2022-06-24
Supplement: s1 [file s1]

## Supplementary Material

Article

### Assessment of injury by four major pests in soybean plants using hyperspectral proximal imaging

Fernando Henrique Iost Filho <sup>1,\*</sup>, Juliano de Bastos Pazini <sup>1,†</sup>, André Dantas Medeiros<sup>2</sup>; David Luciano Rosalen<sup>3</sup>, Pedro T. Yamamoto<sup>1</sup>

Table S1. Mean reflectance from soybean plants (reproductive stage) under different levels of *Euschistus heros* infestation in each of the 28 bands of greater relevance in the classification based on principal component analysis (PCA).

| Spectral band          | Stink bugs five plants <sup>-1a</sup> |        |        |                      | df <sub>Treat</sub> ; F; P; CV% |
|------------------------|---------------------------------------|--------|--------|----------------------|---------------------------------|
|                        | 0                                     | 2      | 5      | 10                   |                                 |
| Day 0 – No infestation |                                       |        |        |                      |                                 |
| 744                    | 0.5736                                | 0.5717 | 0.5755 | 0.5699 <sup>ns</sup> | 3; 2.192; 0.0907; 1.90          |
| 746                    | 0.5843                                | 0.5823 | 0.5855 | 0.5801 <sup>ns</sup> | 3; 2.230; 0.0864; 1.84          |
| 742                    | 0.5613                                | 0.5597 | 0.5640 | 0.5584 <sup>ns</sup> | 3; 2.155; 0.0951; 1.97          |
| 748                    | 0.5936                                | 0.5915 | 0.5942 | 0.5887 <sup>ns</sup> | 3; 2.438; 0.0662; 1.80          |
| 750                    | 0.6019                                | 0.5995 | 0.6018 | 0.5964 <sup>ns</sup> | 3; 2.575; 0.0555; 1.78          |
| 740                    | 0.5474                                | 0.5459 | 0.5510 | 0.5453 <sup>ns</sup> | 3; 2.291; 0.0799; 2.07          |
| 753                    | 0.6088                                | 0.6064 | 0.6083 | 0.6030 <sup>ns</sup> | 3; 2.604; 0.0550; 1.76          |
| 755                    | 0.6150                                | 0.6125 | 0.6141 | 0.6088 <sup>ns</sup> | 3; 2.609; 0.0537; 1.75          |
| 738                    | 0.5316                                | 0.5305 | 0.5363 | 0.5307 <sup>ns</sup> | 3; 2.506; 0.0607; 2.19          |
| 934                    | 0.7257                                | 0.7236 | 0.7221 | 0.7199 <sup>ns</sup> | 3; 1.382; 0.2498; 1.95          |
| 757                    | 0.6203                                | 0.6177 | 0.6190 | 0.6138 <sup>ns</sup> | 3; 2.082; 0.0951; 1.74          |
| 759                    | 0.6249                                | 0.6222 | 0.6233 | 0.6183 <sup>ns</sup> | 3; 2.609; 0.0510; 1.74          |
| 937                    | 0.7266                                | 0.7245 | 0.7230 | 0.7205 <sup>ns</sup> | 3; 1.466; 0.2255; 1.95          |
| 932                    | 0.7249                                | 0.7227 | 0.7211 | 0.7189 <sup>ns</sup> | 3; 1.483; 0.2208; 1.95          |
| 761                    | 0.6290                                | 0.6263 | 0.6272 | 0.6222 <sup>ns</sup> | 3; 2.203; 0.0573; 1.73          |
| 768                    | 0.6381                                | 0.6352 | 0.6357 | 0.6313 <sup>ns</sup> | 3; 2.534; 0.0645; 1.71          |
| 930                    | 0.7243                                | 0.7220 | 0.7204 | 0.7179 <sup>ns</sup> | 3; 1.610; 0.1887; 1.96          |
| 763                    | 0.6324                                | 0.6296 | 0.6304 | 0.6255 <sup>ns</sup> | 3; 2.183; 0.0893; 1.72          |
| 770                    | 0.6405                                | 0.6377 | 0.6380 | 0.6336 <sup>ns</sup> | 3; 2.583; 0.0592; 1.72          |
| 772                    | 0.6427                                | 0.6398 | 0.6401 | 0.6358 <sup>ns</sup> | 3; 2.607; 0.0540; 1.71          |
| 939                    | 0.7273                                | 0.7252 | 0.7236 | 0.7214 <sup>ns</sup> | 3; 1.407; 0.2423; 1.98          |

|                    |        |        |        |                      |                        |
|--------------------|--------|--------|--------|----------------------|------------------------|
| 766                | 0.6354 | 0.6326 | 0.6332 | 0.6285 <sup>ns</sup> | 3; 2.610; 0.0510; 1.72 |
| 941                | 0.7281 | 0.7259 | 0.7244 | 0.7219 <sup>ns</sup> | 3; 1.451; 0.2296; 1.98 |
| 943                | 0.7292 | 0.7271 | 0.7256 | 0.7232 <sup>ns</sup> | 3; 1.405; 0.2430; 1.97 |
| 921                | 0.7207 | 0.7182 | 0.7166 | 0.7138 <sup>ns</sup> | 3; 1.865; 0.1373; 1.98 |
| 925                | 0.7226 | 0.7202 | 0.7185 | 0.7158 <sup>ns</sup> | 3; 1.815; 0.1461; 1.99 |
| 945                | 0.7297 | 0.7276 | 0.7262 | 0.7238 <sup>ns</sup> | 3; 1.372; 0.2528; 1.97 |
| 774                | 0.6448 | 0.6419 | 0.6420 | 0.6378 <sup>ns</sup> | 3; 2.518; 0.0685; 1.71 |
| -----              |        |        |        |                      |                        |
| 5 DAI <sup>b</sup> |        |        |        |                      |                        |
| -----              |        |        |        |                      |                        |
| 544                | 0.0957 | 0.0999 | 0.1000 | 0.1006 <sup>ns</sup> | 3; 0.794; 0.4989; 7.84 |
| 537                | 0.0933 | 0.0973 | 0.0974 | 0.0979 <sup>ns</sup> | 3; 0.759; 0.5185; 7.76 |
| 546                | 0.0964 | 0.1006 | 0.1008 | 0.1013 <sup>ns</sup> | 3; 0.794; 0.4989; 7.86 |
| 541                | 0.0950 | 0.0992 | 0.0993 | 0.0998 <sup>ns</sup> | 3; 0.776; 0.5089; 7.82 |
| 539                | 0.0943 | 0.0984 | 0.0985 | 0.0990 <sup>ns</sup> | 3; 0.773; 0.5106; 7.78 |
| 548                | 0.0971 | 0.1014 | 0.1015 | 0.1021 <sup>ns</sup> | 3; 0.790; 0.5011; 7.88 |
| 710                | 0.1996 | 0.2075 | 0.2062 | 0.2091 <sup>ns</sup> | 3; 1.250; 0.2933; 6.89 |
| 535                | 0.0920 | 0.0960 | 0.0961 | 0.0966 <sup>ns</sup> | 3; 0.771; 0.5119; 7.71 |
| 712                | 0.2240 | 0.2322 | 0.2307 | 0.2339 <sup>ns</sup> | 3; 1.234; 0.2989; 6.45 |
| 550                | 0.0977 | 0.1020 | 0.1021 | 0.1027 <sup>ns</sup> | 3; 0.798; 0.4966; 7.88 |
| 533                | 0.0902 | 0.0940 | 0.0942 | 0.0946 <sup>ns</sup> | 3; 0.766; 0.5145; 7.63 |
| 708                | 0.1766 | 0.1840 | 0.1829 | 0.1855 <sup>ns</sup> | 3; 1.266; 0.2878; 7.27 |
| 714                | 0.2498 | 0.2581 | 0.2565 | 0.2599 <sup>ns</sup> | 3; 1.208; 0.3084; 5.97 |
| 552                | 0.0980 | 0.1023 | 0.1025 | 0.1030 <sup>ns</sup> | 3; 0.784; 0.5042; 7.88 |
| 554                | 0.0977 | 0.1020 | 0.1022 | 0.1027 <sup>ns</sup> | 3; 0.773; 0.5109; 7.87 |
| 531                | 0.0878 | 0.0916 | 0.0918 | 0.0921 <sup>ns</sup> | 3; 0.767; 0.5142; 7.53 |
| 716                | 0.2767 | 0.2851 | 0.2833 | 0.2867 <sup>ns</sup> | 3; 1.163; 0.3256; 5.46 |
| 556                | 0.0968 | 0.1010 | 0.1012 | 0.1017 <sup>ns</sup> | 3; 0.770; 0.5121; 7.86 |
| 705                | 0.1550 | 0.1619 | 0.1611 | 0.1630 <sup>ns</sup> | 3; 1.265; 0.2880; 7.54 |
| 529                | 0.0849 | 0.0885 | 0.0887 | 0.0889 <sup>ns</sup> | 3; 0.779; 0.5074; 7.39 |
| 558                | 0.0953 | 0.0995 | 0.0997 | 0.1001 <sup>ns</sup> | 3; 0.768; 0.5135; 7.83 |
| 718                | 0.3043 | 0.3126 | 0.3109 | 0.3140 <sup>ns</sup> | 3; 1.090; 0.3551; 4.96 |
| 560                | 0.0935 | 0.0976 | 0.0978 | 0.0982 <sup>ns</sup> | 3; 0.759; 0.5186; 7.77 |
| 703                | 0.1349 | 0.1412 | 0.1406 | 0.1420 <sup>ns</sup> | 3; 1.292; 0.2790; 7.69 |
| 527                | 0.0816 | 0.0850 | 0.0852 | 0.0853 <sup>ns</sup> | 3; 0.801; 0.4952; 7.20 |
| 562                | 0.0914 | 0.0954 | 0.0956 | 0.0959 <sup>ns</sup> | 3; 0.772; 0.5112; 7.71 |

|        |        |        |        |                      |                        |
|--------|--------|--------|--------|----------------------|------------------------|
| 525    | 0.0777 | 0.0809 | 0.0812 | 0.0811 <sup>ns</sup> | 3; 0.824; 0.4823; 6.95 |
| 720    | 0.3324 | 0.3406 | 0.3389 | 0.3416 <sup>ns</sup> | 3; 0.979; 0.4040; 4.47 |
| -----  |        |        |        |                      |                        |
| 10 DAI |        |        |        |                      |                        |
| -----  |        |        |        |                      |                        |
| 629    | 0.0595 | 0.0601 | 0.0585 | 0.0580 <sup>ns</sup> | 3; 0.841; 0.4734; 4.86 |
| 631    | 0.0595 | 0.0600 | 0.0585 | 0.0580 <sup>ns</sup> | 3; 0.861; 0.4628; 4.85 |
| 633    | 0.0593 | 0.0599 | 0.0583 | 0.0578 <sup>ns</sup> | 3; 0.933; 0.4260; 4.84 |
| 627    | 0.0595 | 0.0601 | 0.0586 | 0.0581 <sup>ns</sup> | 3; 0.808; 0.4909; 4.87 |
| 625    | 0.0596 | 0.0602 | 0.0586 | 0.0582 <sup>ns</sup> | 3; 0.790; 0.5010; 4.89 |
| 635    | 0.0590 | 0.0596 | 0.0580 | 0.0575 <sup>ns</sup> | 3; 1.014; 0.3881; 4.80 |
| 623    | 0.0598 | 0.0604 | 0.0589 | 0.0584 <sup>ns</sup> | 3; 0.764; 0.5158; 4.91 |
| 638    | 0.0585 | 0.0592 | 0.0576 | 0.0570 <sup>ns</sup> | 3; 1.199; 0.3118; 4.75 |
| 621    | 0.0602 | 0.0607 | 0.0592 | 0.0587 <sup>ns</sup> | 3; 0.685; 0.5626; 4.97 |
| 618    | 0.0606 | 0.0612 | 0.0596 | 0.0592 <sup>ns</sup> | 3; 0.632; 0.5954; 5.03 |
| 640    | 0.0580 | 0.0586 | 0.0570 | 0.0565 <sup>ns</sup> | 3; 1.353; 0.2590; 4.71 |
| 616    | 0.0612 | 0.0617 | 0.0603 | 0.0598 <sup>ns</sup> | 3; 0.558; 0.6437; 5.13 |
| 642    | 0.0574 | 0.0581 | 0.0564 | 0.0559 <sup>ns</sup> | 3; 1.566; 0.1996; 4.69 |
| 614    | 0.0620 | 0.0625 | 0.0610 | 0.0605 <sup>ns</sup> | 3; 0.496; 0.6858; 5.25 |
| 644    | 0.0568 | 0.0575 | 0.0558 | 0.0553 <sup>ns</sup> | 3; 1.759; 0.1570; 4.69 |
| 506    | 0.0545 | 0.0550 | 0.0536 | 0.0533 <sup>ns</sup> | 3; 1.034; 0.3793; 4.40 |
| 508    | 0.0557 | 0.0562 | 0.0548 | 0.0545 <sup>ns</sup> | 3; 0.870; 0.4582; 4.51 |
| 612    | 0.0628 | 0.0633 | 0.0619 | 0.0614 <sup>ns</sup> | 3; 0.425; 0.7355; 5.41 |
| 504    | 0.0535 | 0.0540 | 0.0527 | 0.0523 <sup>ns</sup> | 3; 1.160; 0.3267; 4.34 |
| 750    | 0.5998 | 0.6034 | 0.6004 | 0.6011 <sup>ns</sup> | 3; 1.555; 0.2025; 1.68 |
| 746    | 0.5813 | 0.5849 | 0.5819 | 0.5828 <sup>ns</sup> | 3; 1.503; 0.2157; 1.79 |
| 748    | 0.5911 | 0.5948 | 0.5918 | 0.5926 <sup>ns</sup> | 3; 1.568; 0.1991; 4.86 |
| 646    | 0.0563 | 0.0570 | 0.0552 | 0.0547 <sup>ns</sup> | 3; 1.892; 0.1330; 4.85 |
| 511    | 0.0572 | 0.0577 | 0.0564 | 0.0560 <sup>ns</sup> | 3; 0.708; 0.5483; 4.84 |
| 753    | 0.6072 | 0.6108 | 0.6078 | 0.6084 <sup>ns</sup> | 3; 1.569; 0.1989; 4.87 |
| 610    | 0.0637 | 0.0642 | 0.0628 | 0.0623 <sup>ns</sup> | 3; 0.362; 0.7807; 4.89 |
| 502    | 0.0528 | 0.0533 | 0.0519 | 0.0516 <sup>ns</sup> | 3; 1.198; 0.3122; 4.80 |
| 755    | 0.6137 | 0.6173 | 0.6144 | 0.6149 <sup>ns</sup> | 3; 1.557; 0.2018; 4.91 |

<sup>ns</sup> Non-significative by the F test ( $P > 0.05$ ).

<sup>a</sup> Density (n) of stink bugs five plants<sup>-1</sup>.

<sup>b</sup> Days after stink bug infestations (DAI).

Table S2. Mean reflectance from soybean plants (reproductive stage) under different levels of *Diceraeus melacanthus* infestation in each of the 28 bands of greater relevance in the classification based on principal component analysis (PCA).

| Spectral band          | Stink bugs five plants <sup>-1a</sup> |        |        |                      | df <sub>Treat</sub> ; F; P; CV% |
|------------------------|---------------------------------------|--------|--------|----------------------|---------------------------------|
|                        | 0                                     | 2      | 5      | 10                   |                                 |
| Day 0 – No infestation |                                       |        |        |                      |                                 |
| 742                    | 0.5665                                | 0.5651 | 0.5661 | 0.5684 <sup>ns</sup> | 3; 0.821; 0.4839; 1.81          |
| 740                    | 0.5538                                | 0.5523 | 0.5537 | 0.5559 <sup>ns</sup> | 3; 0.974; 0.4059; 1.86          |
| 744                    | 0.5776                                | 0.5762 | 0.5768 | 0.5792 <sup>ns</sup> | 3; 0.711; 0.5462; 1.78          |
| 746                    | 0.5874                                | 0.5861 | 0.5864 | 0.5889 <sup>ns</sup> | 3; 0.654; 0.5809; 1.76          |
| 738                    | 0.5395                                | 0.5379 | 0.5398 | 0.5420 <sup>ns</sup> | 3; 1.165; 0.3245; 1.94          |
| 748                    | 0.5962                                | 0.5949 | 0.5950 | 0.5975 <sup>ns</sup> | 3; 0.619; 0.6037; 1.75          |
| 750                    | 0.6041                                | 0.6028 | 0.6026 | 0.6052 <sup>ns</sup> | 3; 0.600; 0.6161; 1.74          |
| 753                    | 0.6108                                | 0.6095 | 0.6091 | 0.6118 <sup>ns</sup> | 3; 0.600; 0.6156; 1.74          |
| 735                    | 0.5237                                | 0.5220 | 0.5243 | 0.5265 <sup>ns</sup> | 3; 1.369; 0.2540; 2.05          |
| 755                    | 0.6169                                | 0.6156 | 0.6150 | 0.6178 <sup>ns</sup> | 3; 0.614; 0.6067; 1.74          |
| 757                    | 0.6220                                | 0.6207 | 0.6200 | 0.6228 <sup>ns</sup> | 3; 0.614; 0.6070; 1.73          |
| 759                    | 0.6265                                | 0.6251 | 0.6243 | 0.6271 <sup>ns</sup> | 3; 0.619; 0.6037; 1.73          |
| 855                    | 0.7042                                | 0.7020 | 0.7009 | 0.7032 <sup>ns</sup> | 3; 0.597; 0.6179; 1.81          |
| 857                    | 0.7046                                | 0.7023 | 0.7012 | 0.7034 <sup>ns</sup> | 3; 0.604; 0.6132; 1.81          |
| 859                    | 0.7047                                | 0.7024 | 0.7013 | 0.7034 <sup>ns</sup> | 3; 0.609; 0.6099; 1.81          |
| 861                    | 0.7051                                | 0.7028 | 0.7016 | 0.7037 <sup>ns</sup> | 3; 0.625; 0.5996; 1.81          |
| 864                    | 0.7051                                | 0.7028 | 0.7016 | 0.7037 <sup>ns</sup> | 3; 0.629; 0.5974; 1.81          |
| 866                    | 0.7057                                | 0.7033 | 0.7021 | 0.7041 <sup>ns</sup> | 3; 0.632; 0.5956; 1.81          |
| 868                    | 0.7065                                | 0.7041 | 0.7029 | 0.7049 <sup>ns</sup> | 3; 0.631; 0.5957; 1.82          |
| 870                    | 0.7073                                | 0.7049 | 0.7037 | 0.7056 <sup>ns</sup> | 3; 0.629; 0.5975; 1.82          |
| 872                    | 0.7076                                | 0.7051 | 0.7039 | 0.7058 <sup>ns</sup> | 3; 0.628; 0.5981; 1.82          |
| 813                    | 0.6827                                | 0.6806 | 0.6794 | 0.6820 <sup>ns</sup> | 3; 0.714; 0.5448; 1.75          |
| 815                    | 0.6844                                | 0.6823 | 0.6810 | 0.6836 <sup>ns</sup> | 3; 0.705; 0.5504; 1.75          |
| 822                    | 0.6887                                | 0.6865 | 0.6853 | 0.6879 <sup>ns</sup> | 3; 0.689; 0.5600; 1.77          |
| 826                    | 0.6912                                | 0.6891 | 0.6878 | 0.6904 <sup>ns</sup> | 3; 0.674; 0.5692; 1.77          |
| 828                    | 0.6926                                | 0.6905 | 0.6892 | 0.6918 <sup>ns</sup> | 3; 0.663; 0.5761; 1.78          |
| 831                    | 0.6936                                | 0.6915 | 0.6902 | 0.6928 <sup>ns</sup> | 3; 0.654; 0.5812; 1.78          |
| 833                    | 0.6948                                | 0.6927 | 0.6915 | 0.6940 <sup>ns</sup> | 3; 0.637; 0.5919; 1.78          |

| 5 DAI <sup>b</sup> |        |        |        |                      |                        |
|--------------------|--------|--------|--------|----------------------|------------------------|
| 742                | 0.5629 | 0.5661 | 0.5609 | 0.5589 <sup>ns</sup> | 3; 1.601; 0.1910; 2.80 |
| 744                | 0.5755 | 0.5784 | 0.5733 | 0.5715 <sup>ns</sup> | 3; 1.554; 0.2020; 2.73 |
| 740                | 0.5483 | 0.5519 | 0.5467 | 0.5445 <sup>ns</sup> | 3; 1.696; 0.1700; 2.87 |
| 746                | 0.5865 | 0.5891 | 0.5840 | 0.5824 <sup>ns</sup> | 3; 1.500; 0.2170; 2.68 |
| 748                | 0.5961 | 0.5985 | 0.5934 | 0.5920 <sup>ns</sup> | 3; 1.476; 0.2230; 2.62 |
| 750                | 0.6045 | 0.6067 | 0.6018 | 0.6002 <sup>ns</sup> | 3; 1.453; 0.2290; 2.57 |
| 738                | 0.5319 | 0.5361 | 0.5308 | 0.5283 <sup>ns</sup> | 3; 1.817; 0.1460; 2.95 |
| 753                | 0.6116 | 0.6137 | 0.6087 | 0.6073 <sup>ns</sup> | 3; 1.473; 0.2240; 2.52 |
| 755                | 0.6176 | 0.6197 | 0.6147 | 0.6134 <sup>ns</sup> | 3; 1.462; 0.2270; 2.48 |
| 787                | 0.6567 | 0.6588 | 0.6538 | 0.6524 <sup>ns</sup> | 3; 1.736; 0.1610; 2.17 |
| 794                | 0.6607 | 0.6628 | 0.6580 | 0.6563 <sup>ns</sup> | 3; 1.747; 0.1590; 2.17 |
| 785                | 0.6551 | 0.6572 | 0.6523 | 0.6508 <sup>ns</sup> | 3; 1.722; 0.1640; 2.19 |
| 757                | 0.6230 | 0.6249 | 0.6201 | 0.6188 <sup>ns</sup> | 3; 1.427; 0.2370; 2.44 |
| 789                | 0.6579 | 0.6600 | 0.6552 | 0.6535 <sup>ns</sup> | 3; 1.7430; 0.160; 2.17 |
| 798                | 0.6636 | 0.6656 | 0.6609 | 0.6589 <sup>ns</sup> | 3; 1.795; 0.1500; 2.17 |
| 800                | 0.6649 | 0.6670 | 0.6622 | 0.6602 <sup>ns</sup> | 3; 1.804; 0.148; 2.16  |
| 759                | 0.6277 | 0.6296 | 0.6248 | 0.6235 <sup>ns</sup> | 3; 1.451; 0.230; 2.41  |
| 796                | 0.6623 | 0.6643 | 0.6597 | 0.6578 <sup>ns</sup> | 3; 1.732; 0.162; 2.16  |
| 761                | 0.6317 | 0.6336 | 0.6288 | 0.6276 <sup>ns</sup> | 3; 1.410, 0.242; 2.38  |
| 781                | 0.6523 | 0.6545 | 0.6494 | 0.6481 <sup>ns</sup> | 3; 1.698; 0.169; 2.20  |
| 792                | 0.6594 | 0.6615 | 0.6567 | 0.6549 <sup>ns</sup> | 3; 1.791; 0.151; 2.17  |
| 774                | 0.6471 | 0.6491 | 0.6442 | 0.6430 <sup>ns</sup> | 3; 1.590; 0.194; 2.22  |
| 783                | 0.6539 | 0.6560 | 0.6511 | 0.6497 <sup>ns</sup> | 3; 1.710; 0.167; 2.19  |
| 768                | 0.6406 | 0.6426 | 0.6377 | 0.6365 <sup>ns</sup> | 3; 1.520; 0.211; 2.29  |
| 809                | 0.6693 | 0.6713 | 0.6667 | 0.6644 <sup>ns</sup> | 3; 1.817; 0.146; 2.16  |
| 813                | 0.6713 | 0.6732 | 0.6687 | 0.6663 <sup>ns</sup> | 3; 1.840; 0.142; 2.17  |
| 772                | 0.6450 | 0.6472 | 0.6421 | 0.6411 <sup>ns</sup> | 3; 1.609; 0.189; 2.23  |
| 779                | 0.6508 | 0.6529 | 0.6479 | 0.6467 <sup>ns</sup> | 3; 1.676; 0.174; 2.20  |
| 10 DAI             |        |        |        |                      |                        |
| 757                | 0.5665 | 0.5651 | 0.5661 | 0.5684 <sup>ns</sup> | 3; 1.217; 0.3051; 2.33 |
| 759                | 0.5538 | 0.5523 | 0.5537 | 0.5559 <sup>ns</sup> | 3; 1.276; 0.2841; 2.32 |
| 755                | 0.5776 | 0.5762 | 0.5768 | 0.5792 <sup>ns</sup> | 3; 1.138; 0.3353; 2.33 |
| 753                | 0.5874 | 0.5861 | 0.5864 | 0.5889 <sup>ns</sup> | 3; 1.058; 0.3685; 2.33 |

|     |        |        |        |                      |                        |
|-----|--------|--------|--------|----------------------|------------------------|
| 761 | 0.5395 | 0.5379 | 0.5398 | 0.5420 <sup>ns</sup> | 3; 1.298; 0.2769; 2.32 |
| 750 | 0.5962 | 0.5949 | 0.5950 | 0.5975 <sup>ns</sup> | 3; 0.981; 0.4032; 2.33 |
| 768 | 0.6041 | 0.6028 | 0.6026 | 0.6052 <sup>ns</sup> | 3; 1.411; 0.2411; 2.30 |
| 763 | 0.6108 | 0.6095 | 0.6091 | 0.6118 <sup>ns</sup> | 3; 1.336; 0.2642; 2.31 |
| 766 | 0.5237 | 0.5220 | 0.5243 | 0.5265 <sup>ns</sup> | 3; 1.382; 0.2498; 2.31 |
| 770 | 0.6169 | 0.6156 | 0.6150 | 0.6178 <sup>ns</sup> | 3; 1.445; 0.2315; 2.29 |
| 787 | 0.6220 | 0.6207 | 0.6200 | 0.6228 <sup>ns</sup> | 3; 1.511; 0.2134; 2.25 |
| 772 | 0.6265 | 0.6251 | 0.6243 | 0.6271 <sup>ns</sup> | 3; 1.461; 0.2268; 2.29 |
| 789 | 0.7042 | 0.7020 | 0.7009 | 0.7032 <sup>ns</sup> | 3; 1.554; 0.2024; 2.25 |
| 781 | 0.7046 | 0.7023 | 0.7012 | 0.7034 <sup>ns</sup> | 3; 1.513; 0.2129; 2.27 |
| 776 | 0.7047 | 0.7024 | 0.7013 | 0.7034 <sup>ns</sup> | 3; 1.493; 0.2183; 2.28 |
| 792 | 0.7051 | 0.7028 | 0.7016 | 0.7037 <sup>ns</sup> | 3; 1.538; 0.2064; 2.25 |
| 783 | 0.7051 | 0.7028 | 0.7016 | 0.7037 <sup>ns</sup> | 3; 1.533; 0.2076; 2.27 |
| 824 | 0.7057 | 0.7033 | 0.7021 | 0.7041 <sup>ns</sup> | 3; 1.536; 0.2069; 2.22 |
| 794 | 0.7065 | 0.7041 | 0.7029 | 0.7049 <sup>ns</sup> | 3; 1.555; 0.2022; 2.25 |
| 809 | 0.7073 | 0.7049 | 0.7037 | 0.7056 <sup>ns</sup> | 3; 1.533; 0.2077; 2.22 |
| 796 | 0.7076 | 0.7051 | 0.7039 | 0.7058 <sup>ns</sup> | 3; 1.555; 0.2021; 2.24 |
| 798 | 0.6827 | 0.6806 | 0.6794 | 0.6820 <sup>ns</sup> | 3; 1.522; 0.2105; 2.24 |
| 805 | 0.6844 | 0.6823 | 0.6810 | 0.6836 <sup>ns</sup> | 3; 1.540; 0.2058; 2.23 |
| 800 | 0.6887 | 0.6865 | 0.6853 | 0.6879 <sup>ns</sup> | 3; 1.509; 0.2140; 2.23 |
| 779 | 0.6912 | 0.6891 | 0.6878 | 0.6904 <sup>ns</sup> | 3; 1.495; 0.2176; 2.27 |
| 811 | 0.6926 | 0.6905 | 0.6892 | 0.6918 <sup>ns</sup> | 3; 1.529; 0.2087; 2.23 |
| 820 | 0.6936 | 0.6915 | 0.6902 | 0.6928 <sup>ns</sup> | 3; 1.550; 0.2033; 2.23 |
| 831 | 0.6948 | 0.6927 | 0.6915 | 0.6940 <sup>ns</sup> | 3; 1.564; 0.1998; 2.23 |

---

<sup>ns</sup> Non-significative by the F test ( $P > 0.05$ ).

<sup>a</sup> Density (n) of stink bugs five plants<sup>-1</sup>.

<sup>b</sup> Days after stink bug infestations (DAI).

Table S3. Mean reflectance from soybean plants (vegetative stage) under different levels of *Chrysodeixis includens* infestation in each of the 28 bands of greater relevance in the classification based on principal component analysis (PCA).

| Spectral<br>band       | Caterpillars five plants <sup>-1a</sup> |        |        |                      | df <sub>Treat</sub> ; F; P; CV% |
|------------------------|-----------------------------------------|--------|--------|----------------------|---------------------------------|
|                        | 0                                       | 2      | 5      | 10                   |                                 |
| Day 0 – No infestation |                                         |        |        |                      |                                 |
| 744                    | 0.5865                                  | 0.5883 | 0.5885 | 0.5833 <sup>ns</sup> | 3; 1.7704; 0.1545; 2.08         |
| 742                    | 0.5749                                  | 0.5770 | 0.5770 | 0.5717 <sup>ns</sup> | 3; 1.8286; 0.1437; 2.17         |
| 746                    | 0.5967                                  | 0.5983 | 0.5986 | 0.5935 <sup>ns</sup> | 3; 1.6769; 0.1737; 2.01         |
| 748                    | 0.6058                                  | 0.6071 | 0.6076 | 0.6026 <sup>ns</sup> | 3; 1.5792; 0.1961; 1.96         |
| 740                    | 0.5616                                  | 0.5640 | 0.5638 | 0.5584 <sup>ns</sup> | 3; 1.8216; 0.1449; 2.30         |
| 750                    | 0.6138                                  | 0.6148 | 0.6155 | 0.6107 <sup>ns</sup> | 3; 1.4170; 0.2394; 1.94         |
| 753                    | 0.6205                                  | 0.6214 | 0.6223 | 0.6176 <sup>ns</sup> | 3; 1.3049; 0.2744; 1.93         |
| 738                    | 0.5467                                  | 0.5493 | 0.5490 | 0.5435 <sup>ns</sup> | 3; 1.8199; 0.1452; 2.46         |
| 755                    | 0.6266                                  | 0.6272 | 0.6283 | 0.6237 <sup>ns</sup> | 3; 1.2036; 0.3100; 1.92         |
| 757                    | 0.6316                                  | 0.6321 | 0.6333 | 0.6287 <sup>ns</sup> | 3; 1.1342; 0.3367; 1.91         |
| 735                    | 0.5303                                  | 0.5332 | 0.5328 | 0.5271 <sup>ns</sup> | 3; 1.7424; 0.1601; 2.68         |
| 759                    | 0.6362                                  | 0.6366 | 0.6379 | 0.6334 <sup>ns</sup> | 3; 1.0766; 0.3604; 1.90         |
| 761                    | 0.6402                                  | 0.6405 | 0.6419 | 0.6375 <sup>ns</sup> | 3; 1.0065; 0.3913; 1.91         |
| 763                    | 0.6434                                  | 0.6437 | 0.6452 | 0.6409 <sup>ns</sup> | 3; 0.9501; 0.4177; 1.92         |
| 766                    | 0.6462                                  | 0.6465 | 0.6481 | 0.6438 <sup>ns</sup> | 3; 0.9228; 0.4310; 1.91         |
| 768                    | 0.6488                                  | 0.6491 | 0.6507 | 0.6465 <sup>ns</sup> | 3; 0.8876; 0.4487; 1.91         |
| 733                    | 0.5122                                  | 0.5152 | 0.5147 | 0.5089 <sup>ns</sup> | 3; 1.6395; 0.1820; 2.95         |
| 770                    | 0.6515                                  | 0.6516 | 0.6535 | 0.6493 <sup>ns</sup> | 3; 0.8184; 0.4853; 1.94         |
| 772                    | 0.6540                                  | 0.6541 | 0.6561 | 0.6520 <sup>ns</sup> | 3; 0.7774; 0.5080; 1.96         |
| 928                    | 0.7418                                  | 0.7408 | 0.7445 | 0.7375 <sup>ns</sup> | 3; 1.4059; 0.2427; 2.22         |
| 774                    | 0.6564                                  | 0.6564 | 0.6585 | 0.6544 <sup>ns</sup> | 3; 0.7541; 0.5214; 1.99         |
| 934                    | 0.7435                                  | 0.7429 | 0.7461 | 0.7387 <sup>ns</sup> | 3; 1.6979; 0.1692; 2.14         |
| 930                    | 0.7418                                  | 0.7410 | 0.7445 | 0.7375 <sup>ns</sup> | 3; 1.4604; 0.2270; 2.17         |
| 925                    | 0.7417                                  | 0.7406 | 0.7444 | 0.7375 <sup>ns</sup> | 3; 1.3335; 0.2651; 2.23         |
| 923                    | 0.7414                                  | 0.7401 | 0.7441 | 0.7374 <sup>ns</sup> | 3; 1.2471; 0.2942; 2.28         |
| 776                    | 0.6586                                  | 0.6585 | 0.6608 | 0.6567 <sup>ns</sup> | 3; 0.7202; 0.5412; 2.01         |
| 932                    | 0.7426                                  | 0.7421 | 0.7453 | 0.7381 <sup>ns</sup> | 3; 1.5685; 0.1987; 2.15         |
| 921                    | 0.7406                                  | 0.7391 | 0.7434 | 0.7367 <sup>ns</sup> | 3; 1.1762; 0.3203; 2.33         |

| 5 DAI <sup>b</sup> |          |          |          |          |                           |
|--------------------|----------|----------|----------|----------|---------------------------|
| 928                | 0.7158 a | 0.7198 a | 0.7237 a | 0.7234 a | 3; 2.3018; 0.0788; 2.28   |
| 930                | 0.7164 a | 0.7205 a | 0.7247 a | 0.7247 a | 3; 2.5840; 0.0549; 2.29   |
| 923                | 0.7158 a | 0.7197 a | 0.7233 a | 0.7223 a | 3; 1.9361; 0.1255; 2.25   |
| 925                | 0.7159 a | 0.7198 a | 0.7235 a | 0.7229 a | 3; 2.0945; 0.1027; 2.27   |
| 919                | 0.7128 a | 0.7165 a | 0.7198 a | 0.7185 a | 3; 1.6958; 0.1696; 2.21   |
| 921                | 0.7146 a | 0.7184 a | 0.7219 a | 0.7208 a | 3; 1.8156; 0.1460; 2.23   |
| 932                | 0.7168 b | 0.7206 b | 0.7253 a | 0.7256 a | 3; 2.8160; 0.0407; 2.31   |
| 917                | 0.7118 a | 0.7155 a | 0.7188 a | 0.7171 a | 3; 1.6136; 0.1879; 2.20   |
| 934                | 0.7176 b | 0.7218 b | 0.7264 a | 0.7272 a | 3; 3.1144; 0.0276; 2.35   |
| 937                | 0.7190 b | 0.7233 b | 0.7280 a | 0.7293 a | 3; 3.3415; 0.0206; 2.37   |
| 939                | 0.7200 b | 0.7243 b | 0.7292 a | 0.7308 a | 3; 3.5398; 0.0159; 2.39   |
| 941                | 0.7214 b | 0.7257 b | 0.7307 a | 0.7328 a | 3; 3.8239; 0.0110; 2.41   |
| 914                | 0.7100 a | 0.7137 a | 0.7168 a | 0.7149 a | 3; 1.5293; 0.2086; 2.17   |
| 912                | 0.7091 a | 0.7128 a | 0.7158 a | 0.7136 a | 3; 1.4912; 0.2186; 2.16   |
| 910                | 0.7078 a | 0.7114 a | 0.7143 a | 0.7119 a | 3; 1.4119; 0.2409; 2.15   |
| 943                | 0.7231 b | 0.7174 b | 0.7327 a | 0.7352 a | 3; 4.1415; 0.0072; 2.44   |
| 908                | 0.7070 a | 0.7105 a | 0.7133 a | 0.7108 a | 3; 1.3380; 0.2636; 2.14   |
| 945                | 0.7243 b | 0.7287 b | 0.7342 a | 0.7371 a | 3; 4.4605; 0.0048; 2.47   |
| 905                | 0.7060 a | 0.7095 a | 0.7123 a | 0.7095 a | 3; 1.3066; 0.2738; 2.12   |
| 903                | 0.7049 a | 0.7084 a | 0.7111 a | 0.7081 a | 3; 1.2656; 0.2877; 2.11   |
| 901                | 0.7046 a | 0.7080 a | 0.7105 a | 0.7074 a | 3; 1.1922; 0.5214; 2.10   |
| 948                | 0.7249 b | 0.7294 b | 0.7350 a | 0.7384 a | 3; 4.8665; 0.0028; 2.50   |
| 950                | 0.7256 b | 0.7301 b | 0.7360 a | 0.7399 a | 3; 5.2107; 0.0018; 2.52   |
| 899                | 0.7034 a | 0.7068 a | 0.7093 a | 0.7061 a | 3; 1.1688; 0.3231; 2.10   |
| 897                | 0.7032 a | 0.7065 a | 0.7088 a | 0.7056 a | 3; 1.1307; 0.3381; 2.10   |
| 952                | 0.7266 b | 0.7313 b | 0.7372 a | 0.7416 a | 3; 5.5504; 0.0012; 2.56   |
| 894                | 0.7023 a | 0.7057 a | 0.7079 a | 0.7045 a | 3; 1.1046; 0.3487; 2.09   |
| 892                | 0.7011 a | 0.7044 a | 0.7065 a | 0.7031 a | 3; 1.0742; 0.3614; 2.08   |
| 10 DAI             |          |          |          |          |                           |
| 695                | 0.0903 c | 0.0956 c | 0.1078 b | 0.1304 a | 3; 41.1336; <0.001; 17.55 |
| 697                | 0.1030 c | 0.1101 c | 0.1246 b | 0.1510 a | 3; 43.5954; <0.001; 17.66 |
| 610                | 0.0657 c | 0.0700 c | 0.0807 b | 0.0974 a | 3; 46.0758; <0.001; 17.75 |
| 608                | 0.0669 c | 0.0714 c | 0.0823 b | 0.0996 a | 3; 46.534; <0.001; 17.85  |

|     |          |          |          |          |                           |
|-----|----------|----------|----------|----------|---------------------------|
| 606 | 0.0679 c | 0.0727 c | 0.0838 b | 0.1015 a | 3; 46.7029; <0.001; 17.93 |
| 591 | 0.0723 c | 0.0778 c | 0.0900 b | 0.1090 a | 3; 47.4755; <0.001; 18.14 |
| 612 | 0.0646 c | 0.0687 c | 0.0790 b | 0.0953 a | 3; 47.7595; <0.001; 17.62 |
| 604 | 0.0689 c | 0.0738 c | 0.0852 b | 0.1032 a | 3; 46.9613; <0.001; 17.99 |
| 589 | 0.0731 c | 0.0788 c | 0.0911 b | 0.1103 a | 3; 47.4464; <0.001; 18.17 |
| 593 | 0.0716 c | 0.0771 c | 0.0891 b | 0.1080 a | 3; 47.4528; <0.001; 18.11 |
| 602 | 0.0696 c | 0.0747 c | 0.0862 b | 0.1044 a | 3; 47.1891; <0.001; 18.02 |
| 596 | 0.0711 c | 0.0764 c | 0.0883 b | 0.1070 a | 3; 47.3343; <0.001; 18.10 |
| 614 | 0.0636 c | 0.0674 c | 0.0775 b | 0.0931 a | 3; 45.2401; <0.001; 17.46 |
| 598 | 0.0706 c | 0.0759 c | 0.0877 b | 0.1063 a | 3; 47.3820; <0.001; 18.07 |
| 600 | 0.0702 c | 0.0754 c | 0.0871 b | 0.1055 a | 3; 47.2818; <0.001; 18.05 |
| 587 | 0.0741 c | 0.0800 c | 0.0925 b | 0.1120 a | 3; 47.5352; <0.001; 18.16 |
| 585 | 0.0754 c | 0.0815 c | 0.0942 b | 0.1140 a | 3; 47.5822; <0.001; 18.18 |
| 616 | 0.0626 c | 0.0662 c | 0.0759 b | 0.0912 a | 3; 44.8402; <0.001; 17.29 |
| 583 | 0.0769 c | 0.0831 c | 0.0961 b | 0.1162 a | 3; 47.4903; <0.001; 18.16 |
| 618 | 0.0619 c | 0.0653 c | 0.0748 b | 0.0896 a | 3; 44.3453; <0.001; 17.15 |
| 581 | 0.0785 c | 0.0850 c | 0.0983 b | 0.1187 a | 3; 47.4120; <0.001; 18.14 |
| 621 | 0.0613 c | 0.0645 c | 0.0738 b | 0.0884 a | 3; 43.9926; <0.001; 17.01 |
| 623 | 0.0609 c | 0.0640 c | 0.0731 b | 0.0875 a | 3; 43.6739; <0.001; 16.92 |
| 579 | 0.0805 c | 0.0873 c | 0.1008 b | 0.1216 a | 3; 47.4118; <0.001; 18.08 |
| 625 | 0.0606 c | 0.0637 c | 0.0727 b | 0.0869 a | 3; 43.5398; <0.001; 16.86 |
| 629 | 0.0605 c | 0.0634 c | 0.0724 b | 0.0865 a | 3; 43.3509; <0.001; 16.82 |
| 627 | 0.0605 c | 0.0635 c | 0.0725 b | 0.0866 a | 3; 43.4315; <0.001; 16.83 |
| 699 | 0.1193 c | 0.1280 c | 0.1443 b | 0.1734 a | 3; 44.3064; <0.001; 16.98 |

\* Mean values followed by the same letter does not differ significantly by the Scott-Knott test ( $P < 0.05$ );

<sup>ns</sup> Non-significative [F test ( $P > 0.05$ )].

<sup>a</sup> Density (n) of caterpillars five plants<sup>-1</sup>.

<sup>b</sup> Days after caterpillar infestations (DAI).

Table S4. Mean reflectance from soybean plants (reproductive stage) under different levels of *Chrysodeixis includens* infestation in each of the 28 bands of greater relevance in the classification based on principal component analysis (PCA).

| Spectral               | Caterpillars five plants <sup>-1a</sup> |        |        |                      | df <sub>Treat</sub> ; F; P; CV% |
|------------------------|-----------------------------------------|--------|--------|----------------------|---------------------------------|
| band                   | 0                                       | 2      | 5      | 10                   |                                 |
| Day 0 – No infestation |                                         |        |        |                      |                                 |
| 943                    | 0.7455                                  | 0.7421 | 0.7427 | 0.7369 <sup>ns</sup> | 3; 0.9177; 0.4336; 1.68         |
| 948                    | 0.7477                                  | 0.7445 | 0.7453 | 0.7393 <sup>ns</sup> | 3; 0.7961; 0.4977; 1.70         |
| 950                    | 0.7482                                  | 0.7453 | 0.7461 | 0.7400 <sup>ns</sup> | 3; 0.6727; 0.5699; 1.70         |
| 952                    | 0.7489                                  | 0.7461 | 0.7471 | 0.7410 <sup>ns</sup> | 3; 0.5745; 0.6326; 1.71         |
| 954                    | 0.7500                                  | 0.7474 | 0.7486 | 0.7423 <sup>ns</sup> | 3; 0.4867; 0.6920; 1.71         |
| 945                    | 0.7459                                  | 0.7425 | 0.7433 | 0.7374 <sup>ns</sup> | 3; 0.8823; 0.4516; 1.69         |
| 939                    | 0.7434                                  | 0.7398 | 0.7402 | 0.7346 <sup>ns</sup> | 3; 1.0637; 0.3661; 1.67         |
| 941                    | 0.7447                                  | 0.7412 | 0.7416 | 0.7360 <sup>ns</sup> | 3; 0.9961; 0.3962; 1.67         |
| 937                    | 0.7425                                  | 0.7388 | 0.7391 | 0.7336 <sup>ns</sup> | 3; 1.1574; 0.3277; 1.66         |
| 957                    | 0.7490                                  | 0.7466 | 0.7478 | 0.7416 <sup>ns</sup> | 3; 0.3997; 0.7534; 1.70         |
| 959                    | 0.7497                                  | 0.7477 | 0.7490 | 0.7427 <sup>ns</sup> | 3; 0.3305; 0.8033; 1.71         |
| 961                    | 0.7508                                  | 0.7489 | 0.7503 | 0.7440 <sup>ns</sup> | 3; 0.2772; 0.8418; 1.72         |
| 923                    | 0.7382                                  | 0.7339 | 0.7339 | 0.7285 <sup>ns</sup> | 3; 1.6596; 0.1777; 1.66         |
| 925                    | 0.7388                                  | 0.7347 | 0.7347 | 0.7293 <sup>ns</sup> | 3; 1.5715; 0.1982; 1.66         |
| 934                    | 0.7410                                  | 0.7372 | 0.7373 | 0.7320 <sup>ns</sup> | 3; 1.2816; 0.2824; 1.64         |
| 928                    | 0.7390                                  | 0.7349 | 0.7349 | 0.7296 <sup>ns</sup> | 3; 1.5153; 0.2124; 1.65         |
| 921                    | 0.7364                                  | 0.7320 | 0.7319 | 0.7266 <sup>ns</sup> | 3; 1.8090; 0.1475; 1.65         |
| 963                    | 0.7513                                  | 0.7496 | 0.7510 | 0.7448 <sup>ns</sup> | 3; 0.2439; 0.8656; 1.72         |
| 919                    | 0.7355                                  | 0.7311 | 0.7310 | 0.7258 <sup>ns</sup> | 3; 1.7824; 0.1525; 1.64         |
| 932                    | 0.7397                                  | 0.7358 | 0.7357 | 0.7306 <sup>ns</sup> | 3; 1.3948; 0.2462; 1.64         |
| 930                    | 0.7396                                  | 0.7356 | 0.7354 | 0.7304 <sup>ns</sup> | 3; 1.4741; 0.2235; 1.64         |
| 966                    | 0.7524                                  | 0.7509 | 0.7525 | 0.7461 <sup>ns</sup> | 3; 0.2292; 0.8760; 1.73         |
| 917                    | 0.7339                                  | 0.7295 | 0.7293 | 0.7242 <sup>ns</sup> | 3; 1.8653; 0.1374; 1.64         |
| 839                    | 0.6968                                  | 0.6922 | 0.6915 | 0.6869 <sup>ns</sup> | 3; 2.3745; 0.0720; 1.64         |
| 968                    | 0.7527                                  | 0.7513 | 0.7530 | 0.7464 <sup>ns</sup> | 3; 0.2391; 0.8690; 1.74         |
| 837                    | 0.6951                                  | 0.6906 | 0.6899 | 0.6854 <sup>ns</sup> | 3; 2.3824; 0.0713; 1.62         |
| 846                    | 0.7002                                  | 0.6956 | 0.6949 | 0.6903 <sup>ns</sup> | 3; 2.4266; 0.0674; 1.64         |
| 914                    | 0.7326                                  | 0.7282 | 0.7278 | 0.7229 <sup>ns</sup> | 3; 1.9110; 0.1297; 1.63         |

| 5 DAI <sup>b</sup> |          |          |          |                      |                          |
|--------------------|----------|----------|----------|----------------------|--------------------------|
| 515                | 0.0661 a | 0.0666 a | 0.0688 b | 0.0680 b             | 3; 3.5493; 0.0157; 6.69  |
| 513                | 0.0634 a | 0.0636 a | 0.0661 b | 0.0650 b             | 3; 3.6529; 0.0137; 6.76  |
| 511                | 0.0613 a | 0.0612 a | 0.0638 b | 0.0625 b             | 3; 3.8380; 0.0108; 6.84  |
| 848                | 0.7078   | 0.7034   | 0.7056   | 0.7024 <sup>ns</sup> | 3; 1.0469; 0.3732; 2.26  |
| 908                | 0.7317   | 0.7273   | 0.7316   | 0.7291 <sup>ns</sup> | 3; 0.7942; 0.4986; 2.19  |
| 910                | 0.7325   | 0.7281   | 0.7326   | 0.7303 <sup>ns</sup> | 3; 0.8188; 0.4851; 2.19  |
| 517                | 0.0693 a | 0.0701 a | 0.0721 b | 0.0716 b             | 3; 3.4497; 0.0179; 6.69  |
| 850                | 0.7084   | 0.7039   | 0.7062   | 0.7030 <sup>ns</sup> | 3; 1.0513; 0.3713; 2.25  |
| 901                | 0.7297   | 0.7251   | 0.7288   | 0.7261 <sup>ns</sup> | 3; 0.8076; 0.4912; 2.21  |
| 853                | 0.7090   | 0.7045   | 0.7067   | 0.7035 <sup>ns</sup> | 3; 1.0806; 0.3587; 2.25  |
| 857                | 0.7102   | 0.7057   | 0.7080   | 0.7048 <sup>ns</sup> | 3; 1.0658; 0.3650; 2.24  |
| 899                | 0.7285   | 0.7240   | 0.7276   | 0.7248 <sup>ns</sup> | 3; 0.8260; 0.4812; 2.21  |
| 905                | 0.7307   | 0.7262   | 0.7303   | 0.7277 <sup>ns</sup> | 3; 0.7973; 0.4969; 2.20  |
| 855                | 0.7094   | 0.7049   | 0.7071   | 0.7040 <sup>ns</sup> | 3; 1.0594; 0.3678; 2.25  |
| 859                | 0.7109   | 0.7064   | 0.7087   | 0.7055 <sup>ns</sup> | 3; 1.0434; 0.3747; 2.24  |
| 861                | 0.7119   | 0.7073   | 0.7096   | 0.7065 <sup>ns</sup> | 3; 1.0452; 0.3740; 2.24  |
| 864                | 0.7126   | 0.7081   | 0.7103   | 0.7072 <sup>ns</sup> | 3; 1.0513; 0.3713; 2.24  |
| 872                | 0.7169   | 0.7123   | 0.7147   | 0.7117 <sup>ns</sup> | 3; 1.0007; 0.3939; 2.23  |
| 875                | 0.7177   | 0.7131   | 0.7156   | 0.7126 <sup>ns</sup> | 3; 0.9890; 0.3993; 2.22  |
| 892                | 0.7259   | 0.7213   | 0.7245   | 0.7216 <sup>ns</sup> | 3; 0.8882; 0.4484; 2.22  |
| 894                | 0.7271   | 0.7225   | 0.7258   | 0.7229 <sup>ns</sup> | 3; 0.8718; 0.4569; 2.22  |
| 897                | 0.7277   | 0.7231   | 0.7265   | 0.7237 <sup>ns</sup> | 3; 0.8506; 0.4680; 2.21  |
| 903                | 0.7300   | 0.7254   | 0.7294   | 0.7267 <sup>ns</sup> | 3; 0.8495; 0.4686; 2.20  |
| 866                | 0.7134   | 0.7089   | 0.7112   | 0.7082 <sup>ns</sup> | 3; 1.0120; 0.3887; 2.23  |
| 868                | 0.7143   | 0.7097   | 0.7121   | 0.7091 <sup>ns</sup> | 3; 1.0280; 0.3816; 2.23  |
| 870                | 0.7158   | 0.7112   | 0.7136   | 0.7105 <sup>ns</sup> | 3; 1.0223; 0.3841; 2.23  |
| 877                | 0.7187   | 0.7141   | 0.7167   | 0.7136 <sup>ns</sup> | 3; 0.9909; 0.3984; 2.22  |
| 879                | 0.7193   | 0.7148   | 0.7174   | 0.7145 <sup>ns</sup> | 3; 0.9462; 0.4196; 2.22  |
| 10 DAI             |          |          |          |                      |                          |
| 490                | 0.0547 b | 0.0518 a | 0.0561 b | 0.0594 c             | 3; 20.6656; <0.001; 8.00 |
| 492                | 0.0549 b | 0.0520 a | 0.0564 b | 0.0599 c             | 3; 21.8275; <0.001; 8.06 |
| 488                | 0.0545 a | 0.0517 b | 0.0560 c | 0.0590 d             | 3; 19.7614; <0.001; 7.94 |
| 494                | 0.0551 b | 0.0523 a | 0.0566 b | 0.0605 c             | 3; 22.3516; <0.001; 8.22 |

|     |          |          |          |          |                          |
|-----|----------|----------|----------|----------|--------------------------|
| 478 | 0.0542 a | 0.0514 b | 0.0557 c | 0.0585 d | 3; 18.9045; <0.001; 7.90 |
| 496 | 0.0555 b | 0.0526 a | 0.0570 b | 0.0611 c | 3; 23.4505; <0.001; 8.30 |
| 476 | 0.0543 a | 0.0515 b | 0.0557 c | 0.0585 d | 3; 18.8420; <0.001; 7.85 |
| 468 | 0.0543 a | 0.0516 b | 0.0558 c | 0.0585 d | 3; 18.2635; <0.001; 7.84 |
| 466 | 0.0544 a | 0.0517 b | 0.0559 c | 0.0585 d | 3; 17.9560; <0.001; 7.91 |
| 457 | 0.0550 a | 0.0522 b | 0.0566 c | 0.0591 d | 3; 18.3387; <0.001; 7.82 |
| 480 | 0.0542 a | 0.0515 b | 0.0557 c | 0.0586 d | 3; 18.7626; <0.001; 7.93 |
| 455 | 0.0551 a | 0.0523 b | 0.0567 c | 0.0592 d | 3; 18.0998; <0.001; 7.84 |
| 486 | 0.0544 a | 0.0516 b | 0.0559 c | 0.0588 d | 3; 19.3426; <0.001; 7.94 |
| 461 | 0.0546 a | 0.0519 b | 0.0562 c | 0.0588 d | 3; 18.3614; <0.001; 7.85 |
| 482 | 0.0543 a | 0.0515 b | 0.0558 c | 0.0586 d | 3; 18.8938; <0.001; 7.90 |
| 474 | 0.0543 a | 0.0515 b | 0.0558 c | 0.0585 d | 3; 18.6854; <0.001; 7.82 |
| 463 | 0.0545 a | 0.0518 b | 0.0561 c | 0.0587 d | 3; 18.2047; <0.001; 7.84 |
| 470 | 0.0543 a | 0.0515 b | 0.0557 c | 0.0583 d | 3; 18.1679; <0.001; 7.80 |
| 484 | 0.0544 a | 0.0516 b | 0.0558 c | 0.0587 d | 3; 18.8526; <0.001; 7.95 |
| 453 | 0.0552 a | 0.0524 b | 0.0568 c | 0.0592 d | 3; 17.7321; <0.001; 7.79 |
| 500 | 0.0565 a | 0.0536 b | 0.0582 c | 0.0633 d | 3; 26.0742; <0.001; 8.74 |
| 498 | 0.0559 a | 0.0530 b | 0.0575 c | 0.0621 d | 3; 24.9250; <0.001; 8.44 |
| 472 | 0.0543 a | 0.0515 b | 0.0558 c | 0.0584 d | 3; 18.2579; <0.001; 7.89 |
| 459 | 0.0548 a | 0.0521 b | 0.0564 c | 0.0588 d | 3; 17.6488; <0.001; 7.86 |
| 451 | 0.0552 a | 0.0524 b | 0.0568 c | 0.0592 d | 3; 17.2936; <0.001; 7.83 |
| 449 | 0.0553 a | 0.0525 b | 0.0569 c | 0.0591 d | 3; 16.8298; <0.001; 7.87 |
| 447 | 0.0553 a | 0.0525 b | 0.0569 c | 0.0591 d | 3; 16.4730; <0.001; 7.86 |
| 445 | 0.0553 a | 0.0526 b | 0.0569 c | 0.0590 d | 3; 15.8273; <0.001; 7.87 |

\* Mean values followed by the same letter does not differ significantly by the Scott-Knott test ( $P < 0.05$ );

<sup>ns</sup> Non-significative [F test ( $P > 0.05$ )].

<sup>a</sup> Density (n) of caterpillars five plants<sup>-1</sup>.

<sup>b</sup> Days after caterpillar infestations (DAI).

Table S5. Mean reflectance from soybean plants (vegetative stage) under different levels of *Spodoptera eridania* infestation in each of the 28 bands of greater relevance in the classification based on principal component analysis (PCA).

| Spectral               | Caterpillars five plants <sup>-1a</sup> |        |        |                      | df <sub>Treat</sub> ; F; P; CV% |
|------------------------|-----------------------------------------|--------|--------|----------------------|---------------------------------|
| band                   | 0                                       | 2      | 5      | 0                    |                                 |
| Day 0 – No infestation |                                         |        |        |                      |                                 |
| 633                    | 0.0587                                  | 0.0584 | 0.0594 | 0.0593 <sup>ns</sup> | 3; 0.9925; 0.3980; 5.02         |
| 742                    | 0.5669                                  | 0.5636 | 0.5671 | 0.5643 <sup>ns</sup> | 3; 1.5985; 0.1920; 1.56         |
| 631                    | 0.0589                                  | 0.0588 | 0.0597 | 0.0595 <sup>ns</sup> | 3; 0.9345; 0.4256; 5.02         |
| 629                    | 0.0590                                  | 0.0589 | 0.0598 | 0.0596 <sup>ns</sup> | 3; 0.9077; 0.4389; 5.01         |
| 627                    | 0.0591                                  | 0.0590 | 0.0599 | 0.0597 <sup>ns</sup> | 3; 0.8732; 0.4564; 5.02         |
| 729                    | 0.4677                                  | 0.4687 | 0.4697 | 0.4643 <sup>ns</sup> | 3; 2.1780; 0.0929; 2.13         |
| 511                    | 0.0569                                  | 0.0567 | 0.0574 | 0.0570 <sup>ns</sup> | 3; 0.4599; 0.7107; 4.79         |
| 623                    | 0.0595                                  | 0.0595 | 0.0604 | 0.0601 <sup>ns</sup> | 3; 0.8421; 0.4727; 5.01         |
| 625                    | 0.0593                                  | 0.0592 | 0.0601 | 0.0598 <sup>ns</sup> | 3; 0.8558; 0.4655; 5.01         |
| 740                    | 0.5544                                  | 0.5516 | 0.5548 | 0.5517 <sup>ns</sup> | 3; 1.5141; 0.2131; 1.59         |
| 621                    | 0.0601                                  | 0.0602 | 0.0610 | 0.0606 <sup>ns</sup> | 3; 0.8064; 0.4921; 5.02         |
| 746                    | 0.5864                                  | 0.5824 | 0.5863 | 0.5843 <sup>ns</sup> | 3; 1.8061; 0.1484; 1.52         |
| 618                    | 0.0607                                  | 0.0609 | 0.0617 | 0.0613 <sup>ns</sup> | 3; 0.8252; 0.4819; 5.04         |
| 738                    | 0.5407                                  | 0.5384 | 0.5412 | 0.5377 <sup>ns</sup> | 3; 1.5092; 0.2143; 1.64         |
| 616                    | 0.0616                                  | 0.0620 | 0.0627 | 0.0622 <sup>ns</sup> | 3; 0.8625; 0.4620; 5.09         |
| 506                    | 0.0527                                  | 0.0518 | 0.0528 | 0.0529 <sup>ns</sup> | 3; 1.4702; 0.2248; 5.04         |
| 513                    | 0.0598                                  | 0.0602 | 0.0606 | 0.0599 <sup>ns</sup> | 3; 0.5935; 0.6202; 4.87         |
| 614                    | 0.0627                                  | 0.0633 | 0.0639 | 0.0633 <sup>ns</sup> | 3; 0.9326; 0.4265; 5.15         |
| 735                    | 0.5249                                  | 0.5234 | 0.5259 | 0.5219 <sup>ns</sup> | 3; 1.5229; 0.2108; 1.71         |
| 755                    | 0.6115                                  | 0.6072 | 0.6117 | 0.6108 <sup>ns</sup> | 3; 2.191; 0.0913; 1.47          |
| 612                    | 0.0640                                  | 0.0647 | 0.0653 | 0.0645 <sup>ns</sup> | 3; 1.0925; 0.3541; 5.24         |
| 610                    | 0.0653                                  | 0.0662 | 0.0667 | 0.0658 <sup>ns</sup> | 3; 1.2436; 0.2959; 5.34         |
| 596                    | 0.0714                                  | 0.0732 | 0.0734 | 0.0719 <sup>ns</sup> | 3; 2.0934; 0.1034; 5.84         |
| 733                    | 0.5076                                  | 0.5068 | 0.5089 | 0.5045 <sup>ns</sup> | 3; 1.6537; 0.1793; 1.81         |
| 748                    | 0.5943                                  | 0.5901 | 0.5942 | 0.5925 <sup>ns</sup> | 3; 1.8987; 0.1321; 1.50         |
| 608                    | 0.0666                                  | 0.0677 | 0.0682 | 0.0671 <sup>ns</sup> | 3; 1.4320; 0.2356; 5.45         |
| 508                    | 0.0545                                  | 0.0539 | 0.0548 | 0.0547 <sup>ns</sup> | 3; 0.8193; 0.4850; 4.86         |
| 750                    | 0.6009                                  | 0.5966 | 0.6008 | 0.5994 <sup>ns</sup> | 3; 1.9982; 0.1166; 1.49         |

| 5 DAI <sup>b</sup> |          |          |          |                      |                         |
|--------------------|----------|----------|----------|----------------------|-------------------------|
| 787                | 0.6381 a | 0.6426 a | 0.6401 a | 0.6427 a             | 3; 2.1810; 0.0920; 1.58 |
| 785                | 0.6355 a | 0.6402 a | 0.6376 a | 0.6401 a             | 3; 2.1952; 0.0903; 1.58 |
| 789                | 0.6411 a | 0.6456 a | 0.6432 a | 0.6457 a             | 3; 2.1870; 0.0913; 1.58 |
| 783                | 0.6332 a | 0.6379 a | 0.6353 a | 0.6377 a             | 3; 2.1887; 0.0911; 1.58 |
| 792                | 0.6443 a | 0.6488 a | 0.6464 a | 0.6490 a             | 3; 2.1483; 0.0959; 1.58 |
| 781                | 0.6306 a | 0.6353 a | 0.6326 a | 0.6351 a             | 3; 2.1733; 0.0929; 1.59 |
| 779                | 0.6279 a | 0.6325 a | 0.6298 a | 0.6322 a             | 3; 2.1905; 0.0909; 1.58 |
| 776                | 0.6254 a | 0.6301 a | 0.6273 a | 0.6297 a             | 3; 2.2164; 0.0879; 1.58 |
| 794                | 0.6478 a | 0.6524 a | 0.6499 a | 0.6526 a             | 3; 2.1629; 0.0941; 1.59 |
| 774                | 0.6229 a | 0.6276 a | 0.6248 a | 0.6271 a             | 3; 2.1685; 0.0934; 1.58 |
| 796                | 0.6513 a | 0.6558 a | 0.6534 a | 0.6561 a             | 3; 2.1240; 0.0989; 1.60 |
| 798                | 0.6547 a | 0.6592 a | 0.6568 a | 0.6596 a             | 3; 2.1359; 0.0974; 1.60 |
| 772                | 0.6208 a | 0.6255 a | 0.6226 a | 0.6249 a             | 3; 2.1509; 0.0956; 1.59 |
| 800                | 0.6579 a | 0.6624 a | 0.6601 a | 0.6629 a             | 3; 2.1115; 0.1005; 1.60 |
| 802                | 0.6612 a | 0.6657 a | 0.6634 a | 0.6662 a             | 3; 2.1183; 0.0996; 1.61 |
| 805                | 0.6643 a | 0.6688 a | 0.6666 a | 0.6695 a             | 3; 2.1335; 0.0977; 1.61 |
| 811                | 0.6740 a | 0.6785 a | 0.6763 a | 0.6793 a             | 3; 2.1392; 0.0970; 1.62 |
| 809                | 0.6705 a | 0.6750 a | 0.6728 a | 0.6758 a             | 3; 2.1522; 0.0954; 1.61 |
| 807                | 0.6674 a | 0.6719 a | 0.6696 a | 0.6726 a             | 3; 2.1311; 0.0980; 1.61 |
| 770                | 0.6184 a | 0.6231 a | 0.6201 a | 0.6224 a             | 3; 2.1635; 0.0940; 1.60 |
| 892                | 0.7200 b | 0.7260 a | 0.7240 a | 0.7267 a             | 3; 2.6858; 0.0481; 1.70 |
| 813                | 0.6768 a | 0.6813 a | 0.6791 a | 0.6822 a             | 3; 2.1387; 0.0971; 1.62 |
| 815                | 0.6802 a | 0.6847 a | 0.6825 a | 0.6856 a             | 3; 2.1427; 0.0966; 1.62 |
| 901                | 0.7174 b | 0.7236 a | 0.7217 a | 0.7243 a             | 3; 2.8163; 0.0406; 1.72 |
| 894                | 0.7193 b | 0.7254 a | 0.7234 a | 0.7261 a             | 3; 2.7074; 0.0468; 1.71 |
| 888                | 0.7211 b | 0.7270 a | 0.7250 a | 0.7277 a             | 3; 2.5939; 0.0498; 1.70 |
| 879                | 0.7224 a | 0.7280 a | 0.7260 a | 0.7288 a             | 3; 2.4760; 0.0630; 1.67 |
| 886                | 0.7215 b | 0.7273 a | 0.7253 a | 0.7280 a             | 3; 2.5495; 0.0499; 1.70 |
| 10 DAI             |          |          |          |                      |                         |
| 731                | 0.4922   | 0.4941   | 0.4967   | 0.4933 <sup>ns</sup> | 3; 0.6051; 0.6125; 3.32 |
| 733                | 0.5119   | 0.5139   | 0.5159   | 0.5127 <sup>ns</sup> | 3; 0.5324; 0.6607; 3.05 |
| 729                | 0.4709   | 0.4727   | 0.4759   | 0.4723 <sup>ns</sup> | 3; 0.6823; 0.5637; 3.64 |
| 735                | 0.5298   | 0.5319   | 0.5333   | 0.5304 <sup>ns</sup> | 3; 0.4905; 0.6893; 2.84 |

|     |          |          |          |                      |                         |
|-----|----------|----------|----------|----------------------|-------------------------|
| 727 | 0.4480   | 0.4498   | 0.4536   | 0.4498 <sup>ns</sup> | 3; 0.7651; 0.5151; 4.03 |
| 725 | 0.4233   | 0.4251   | 0.4295   | 0.4255 <sup>ns</sup> | 3; 0.8504; 0.4681; 4.48 |
| 738 | 0.5461   | 0.5483   | 0.5492   | 0.5464 <sup>ns</sup> | 3; 0.4557; 0.7136; 2.67 |
| 723 | 0.3969   | 0.3988   | 0.4038   | 0.3996 <sup>ns</sup> | 3; 0.9303; 0.4273; 5.00 |
| 740 | 0.5607   | 0.5630   | 0.5634   | 0.5609 <sup>ns</sup> | 3; 0.4281; 0.7331; 2.55 |
| 720 | 0.3695   | 0.3715   | 0.3769   | 0.3727 <sup>ns</sup> | 3; 1.0125; 0.3886; 5.57 |
| 718 | 0.3412   | 0.3433   | 0.3491   | 0.3448 <sup>ns</sup> | 3; 1.0836; 0.3575; 6.21 |
| 742 | 0.5734   | 0.5758   | 0.5757   | 0.5735 <sup>ns</sup> | 3; 0.4263; 0.7344; 2.45 |
| 716 | 0.3128   | 0.3151   | 0.3210   | 0.3168 <sup>ns</sup> | 3; 1.1436; 0.3330; 6.88 |
| 943 | 0.7229 b | 0.7328 a | 0.7336 a | 0.7372 a             | 3; 5.3860; 0.0014; 2.41 |
| 939 | 0.7231 b | 0.7327 a | 0.7333 a | 0.7366 a             | 3; 4.9616; 0.0025; 2.40 |
| 934 | 0.7237 b | 0.7331 a | 0.7338 a | 0.7367 a             | 3; 4.6572; 0.0037; 2.39 |
| 941 | 0.7221 b | 0.7319 a | 0.7325 a | 0.7360 a             | 3; 5.1410; 0.0020; 2.40 |
| 945 | 0.7234 b | 0.7335 a | 0.7343 a | 0.7380 a             | 3; 5.6321; 0.0010; 2.41 |
| 937 | 0.7238 b | 0.7333 a | 0.7339 a | 0.7371 a             | 3; 4.8081; 0.0030; 2.39 |
| 948 | 0.7230 b | 0.7332 a | 0.7340 a | 0.7379 a             | 3; 5.7965; <0.001; 2.42 |
| 930 | 0.7246 b | 0.7336 a | 0.7340 a | 0.7367 a             | 3; 4.1642; 0.0070; 2.38 |
| 928 | 0.7246 b | 0.7336 a | 0.7339 a | 0.7365 a             | 3; 4.0012; 0.0087; 2.37 |
| 932 | 0.7241 b | 0.7334 a | 0.7339 a | 0.7367 a             | 3; 4.4382; 0.0049; 2.38 |
| 925 | 0.7257 b | 0.7344 a | 0.7346 a | 0.7372 a             | 3; 3.7742; 0.0117; 2.36 |
| 923 | 0.7264 b | 0.7350 a | 0.7352 a | 0.7376 a             | 3; 3.6324; 0.0141; 2.36 |
| 950 | 0.7226 b | 0.7329 a | 0.7338 a | 0.7379 a             | 3; 6.0833; <0.001; 2.43 |
| 952 | 0.7216 b | 0.7321 a | 0.7330 a | 0.7374 a             | 3; 6.3100; <0.001; 2.44 |
| 919 | 0.7269 b | 0.7353 a | 0.7354 a | 0.7376 a             | 3; 3.4242; 0.0185; 2.34 |

\* Mean values followed by the same letter does not differ significantly by the Scott-Knott test ( $P < 0.05$ );

<sup>ns</sup> Non-significative [F test ( $P > 0.05$ )].

<sup>a</sup> Density (n) of caterpillars five plants<sup>-1</sup>.

<sup>b</sup> Days after caterpillar infestations (DAI).

Table S6. Mean reflectance from soybean plants (reproductive stage) under different levels of *Spodoptera eridania* infestation in each of the 28 bands of greater relevance in the classification based on principal component analysis (PCA).

| Spectral               | Caterpillars five plants <sup>-1a</sup> |        |        |                      | df <sub>Treat</sub> ; F; P; CV% |
|------------------------|-----------------------------------------|--------|--------|----------------------|---------------------------------|
| band                   | 0                                       | 2      | 5      | 10                   |                                 |
| Day 0 – No infestation |                                         |        |        |                      |                                 |
| 744                    | 0.5781                                  | 0.5829 | 0.5836 | 0.5860 <sup>ns</sup> | 3; 2.3205; 0.0722; 2.38         |
| 742                    | 0.5659                                  | 0.5714 | 0.5714 | 0.5743 <sup>ns</sup> | 3; 2.4957; 0.0617; 2.48         |
| 740                    | 0.5524                                  | 0.5584 | 0.5577 | 0.5613 <sup>ns</sup> | 3; 2.7125; 0.0538; 2.59         |
| 746                    | 0.5885                                  | 0.5928 | 0.5940 | 0.5960 <sup>ns</sup> | 3; 2.1949; 0.0906; 2.31         |
| 748                    | 0.5980                                  | 0.6019 | 0.6036 | 0.6052 <sup>ns</sup> | 3; 2.1099; 0.1009; 2.25         |
| 750                    | 0.6064                                  | 0.6099 | 0.6119 | 0.6133 <sup>ns</sup> | 3; 2.0242; 0.1125; 2.19         |
| 738                    | 0.5368                                  | 0.5436 | 0.5420 | 0.5464 <sup>ns</sup> | 3; 2.7844; 0.0529; 2.73         |
| 753                    | 0.6136                                  | 0.6167 | 0.6190 | 0.6202 <sup>ns</sup> | 3; 1.9874; 0.1178; 2.15         |
| 813                    | 0.6977                                  | 0.6989 | 0.7021 | 0.7031 <sup>ns</sup> | 3; 1.6322; 0.1839; 1.86         |
| 822                    | 0.7077                                  | 0.7088 | 0.7121 | 0.7132 <sup>ns</sup> | 3; 1.5994; 0.1915; 1.87         |
| 824                    | 0.7097                                  | 0.7108 | 0.7141 | 0.7152 <sup>ns</sup> | 3; 1.6033; 0.1906; 1.87         |
| 807                    | 0.6903                                  | 0.6915 | 0.6947 | 0.6957 <sup>ns</sup> | 3; 1.6743; 0.1745; 1.86         |
| 811                    | 0.6952                                  | 0.6964 | 0.6996 | 0.7006 <sup>ns</sup> | 3; 1.6473; 0.1805; 1.86         |
| 818                    | 0.7031                                  | 0.7042 | 0.7074 | 0.7085 <sup>ns</sup> | 3; 1.6201; 0.1866; 1.87         |
| 755                    | 0.6196                                  | 0.6225 | 0.6250 | 0.6260 <sup>ns</sup> | 3; 1.9448; 0.1243; 2.11         |
| 815                    | 0.7003                                  | 0.7014 | 0.7047 | 0.7057 <sup>ns</sup> | 3; 1.6330; 0.1837; 1.86         |
| 820                    | 0.7052                                  | 0.7063 | 0.7095 | 0.7106 <sup>ns</sup> | 3; 1.6303; 0.1843; 1.87         |
| 809                    | 0.6927                                  | 0.6938 | 0.6971 | 0.6981 <sup>ns</sup> | 3; 1.6667; 0.1762; 1.86         |
| 826                    | 0.7119                                  | 0.7130 | 0.7162 | 0.7174 <sup>ns</sup> | 3; 1.5958; 0.1924; 1.87         |
| 831                    | 0.7163                                  | 0.7173 | 0.7206 | 0.7218 <sup>ns</sup> | 3; 1.5923; 0.1932; 1.87         |
| 828                    | 0.7144                                  | 0.7155 | 0.7187 | 0.7199 <sup>ns</sup> | 3; 1.5579; 0.2016; 1.87         |
| 939                    | 0.7460                                  | 0.7468 | 0.7491 | 0.7512 <sup>ns</sup> | 3; 1.1316; 0.3379; 1.92         |
| 833                    | 0.7186                                  | 0.7197 | 0.7229 | 0.7241 <sup>ns</sup> | 3; 1.5447; 0.2049; 1.87         |
| 943                    | 0.7472                                  | 0.7479 | 0.7502 | 0.7524 <sup>ns</sup> | 3; 1.1453; 0.3325; 1.92         |
| 937                    | 0.7460                                  | 0.7467 | 0.7491 | 0.7510 <sup>ns</sup> | 3; 1.1176; 0.3436; 1.92         |
| 934                    | 0.7457                                  | 0.7463 | 0.7488 | 0.7507 <sup>ns</sup> | 3; 1.1188; 0.3432; 1.91         |
| 945                    | 0.7480                                  | 0.7488 | 0.7510 | 0.7534 <sup>ns</sup> | 3; 1.2059; 0.3093; 1.93         |
| 802                    | 0.6853                                  | 0.6865 | 0.6898 | 0.6907 <sup>ns</sup> | 3; 1.6737; 0.1747; 1.87         |

| 5 DAI <sup>b</sup> |          |          |          |          |                           |
|--------------------|----------|----------|----------|----------|---------------------------|
| 650                | 0.0559 a | 0.0562 a | 0.0562 a | 0.0636 b | 3; 9.0475; <0.001; 14.50  |
| 652                | 0.0557 a | 0.0560 a | 0.0560 a | 0.0635 b | 3; 9.0147; <0.001; 14.59  |
| 654                | 0.0555 a | 0.0559 a | 0.0559 a | 0.0634 b | 3; 9.0353; <0.001; 14.68  |
| 657                | 0.0552 a | 0.0557 a | 0.0557 a | 0.0631 b | 3; 9.0344; <0.001; 14.78  |
| 659                | 0.0550 a | 0.0555 a | 0.0555 a | 0.0629 b | 3; 9.0190; <0.001; 14.88  |
| 661                | 0.0547 a | 0.0553 a | 0.0553 a | 0.0627 b | 3; 8.9807; <0.001; 15.00  |
| 648                | 0.0563 a | 0.0565 a | 0.0565 a | 0.0639 b | 3; 8.9746; <0.001; 14.37  |
| 663                | 0.0545 a | 0.0552 a | 0.0552 a | 0.0626 b | 3; 8.8978; <0.001; 15.07  |
| 646                | 0.0570 a | 0.0570 a | 0.0571 a | 0.0644 b | 3; 8.9191; <0.001; 14.16  |
| 665                | 0.0546 a | 0.0553 a | 0.0554 a | 0.0627 b | 3; 8.8047; <0.001; 15.11  |
| 667                | 0.0549 a | 0.0557 a | 0.0558 a | 0.0630 b | 3; 8.6825; <0.001; 15.08  |
| 644                | 0.0578 a | 0.0577 a | 0.0578 a | 0.0651 b | 3; 8.8160; <0.001; 13.94  |
| 669                | 0.0555 a | 0.0564 a | 0.0565 a | 0.0637 b | 3; 8.5630; <0.001; 15.03  |
| 690                | 0.0717 a | 0.0727 a | 0.0734 a | 0.0827 b | 3; 8.5726; <0.001; 15.58  |
| 671                | 0.0564 a | 0.0573 a | 0.0574 a | 0.0646 b | 3; 8.4151; <0.001; 14.93  |
| 673                | 0.0575 a | 0.0584 a | 0.0586 a | 0.0657 b | 3; 8.2681; <0.001; 14.84  |
| 735                | 0.5256 a | 0.5327 a | 0.5342 a | 0.5680 b | 3; 9.3949; <0.001; 7.68   |
| 738                | 0.5423 a | 0.5506 a | 0.5521 a | 0.5876 b | 3; 9.6417; <0.001; 7.79   |
| 740                | 0.5576 a | 0.5670 a | 0.5684 a | 0.6057 b | 3; 9.8254; <0.001; 7.91   |
| 642                | 0.0587 a | 0.0585 a | 0.0586 a | 0.0658 b | 3; 8.6615; <0.001; 13.70  |
| 733                | 0.5072 a | 0.5130 a | 0.5147 a | 0.5466 b | 3; 9.1029; <0.001; 7.60   |
| 742                | 0.5710 a | 0.5816 a | 0.5828 a | 0.6220 b | 3; 10.0024; <0.001; 8.05  |
| 899                | 0.7264 a | 0.7534 a | 0.7532 a | 0.8341 b | 3; 11.3238; <0.001; 12.12 |
| 901                | 0.7269 a | 0.7540 a | 0.7538 a | 0.8348 b | 3; 11.3259; <0.001; 12.14 |
| 903                | 0.7267 a | 0.7538 a | 0.7537 a | 0.8347 b | 3; 11.3160; <0.001; 12.16 |
| 905                | 0.7273 a | 0.7545 a | 0.7545 a | 0.8357 b | 3; 11.3141; <0.001; 12.18 |
| 908                | 0.7274 a | 0.7546 a | 0.7547 a | 0.8360 b | 3; 11.3121; <0.001; 12.20 |
| 910                | 0.7279 a | 0.7552 a | 0.7553 a | 0.8368 b | 3; 11.3119; <0.001; 12.23 |
| 10 DAI             |          |          |          |          |                           |
| 809                | 0.6716 a | 0.6889 b | 0.6855 b | 0.6928 b | 3; 3.1716; 0.0256; 5.07   |
| 824                | 0.6777 a | 0.6959 b | 0.6923b  | 0.7003 b | 3; 3.3646; 0.0200; 5.18   |
| 828                | 0.6795 a | 0.6979 b | 0.6944 b | 0.7026 b | 3; 3.4321; 0.0183; 5.20   |
| 831                | 0.6805 a | 0.6990 b | 0.6955 b | 0.7037 b | 3; 3.4367; 0.0182; 5.22   |

|     |          |          |          |          |                         |
|-----|----------|----------|----------|----------|-------------------------|
| 835 | 0.6821 a | 0.7008 b | 0.6973 b | 0.7056 b | 3; 3.4836; 0.0171; 5.24 |
| 837 | 0.6834 a | 0.7021 b | 0.6986 b | 0.7070 b | 3; 3.5008; 0.0167; 5.25 |
| 839 | 0.6844 a | 0.7032 b | 0.6997 b | 0.7081 b | 3; 3.5066; 0.0166; 5.26 |
| 842 | 0.6853 a | 0.7043 b | 0.7008 b | 0.7093 b | 3; 3.5282; 0.161; 5.27  |
| 844 | 0.6863 a | 0.7054 b | 0.7018 b | 0.7104 b | 3; 3.5404; 0.0159; 5.29 |
| 846 | 0.6873 a | 0.7065 b | 0.7029 b | 0.7115 b | 3; 3.5560; 0.0156; 5.30 |
| 792 | 0.6634 a | 0.6794 b | 0.6762 b | 0.6826 b | 3; 2.9027; 0.0363; 4.91 |
| 794 | 0.6643 a | 0.6805 b | 0.6772 b | 0.6837 b | 3; 2.9312; 0.035; 4.93  |
| 796 | 0.6651 a | 0.6814 b | 0.6782 b | 0.6846 b | 3; 2.9392; 0.0347; 4.96 |
| 798 | 0.6670 a | 0.6836 b | 0.6802 b | 0.6868 b | 3; 2.9915; 0.0324; 4.98 |
| 800 | 0.6678 a | 0.6846 b | 0.6812 b | 0.6880 b | 3; 3.0252; 0.0310; 5.00 |
| 802 | 0.6689 a | 0.6858 b | 0.6824 b | 0.6893 b | 3; 3.0654; 0.0294; 5.02 |
| 805 | 0.6698 a | 0.6869 b | 0.6835 b | 0.6905 b | 3; 3.0996; 0.0282; 5.04 |
| 807 | 0.6709 a | 0.6881 b | 0.6847 b | 0.6917 b | 3; 3.1300; 0.0271; 5.05 |
| 811 | 0.6725 a | 0.6899 b | 0.6865 b | 0.6939 b | 3; 3.1996; 0.0247; 5.09 |
| 813 | 0.6732 a | 0.6907 b | 0.6873 b | 0.6947 b | 3; 3.2249; 0.0239; 5.10 |
| 815 | 0.6743 a | 0.6919 b | 0.6885 b | 0.6961 b | 3; 3.2592; 0.0229; 5.12 |
| 818 | 0.6752 a | 0.6930 b | 0.6896 b | 0.6972 b | 3; 3.2823; 0.0222; 5.13 |
| 820 | 0.6762 a | 0.6941 b | 0.6907 b | 0.6984 b | 3; 3.3088; 0.0215; 5.15 |
| 822 | 0.6767 a | 0.6948 b | 0.6913 b | 0.6991 b | 3; 3.3388; 0.0206; 5.16 |
| 826 | 0.6785 a | 0.6967 b | 0.6932 b | 0.7012 b | 3; 3.3783; 0.0196; 5.19 |
| 833 | 0.6811 a | 0.6997 b | 0.6962 b | 0.7044 b | 3; 3.4623; 0.0176; 5.23 |
| 848 | 0.6883 a | 0.7076 b | 0.7039 b | 0.7125 b | 3; 3.5480; 0.0157; 5.31 |
| 850 | 0.6891 a | 0.7085 b | 0.7048 b | 0.7134 b | 3; 3.5520; 0.0156; 5.31 |

\* Mean values followed by the same letter does not differ significantly by the Scott-Knott test ( $P < 0.05$ );

<sup>ns</sup> Non-significative [F test ( $P > 0.05$ )].

<sup>a</sup> Density (n) of caterpillars five plants<sup>-1</sup>.

<sup>b</sup> Days after caterpillar infestations (DAI).
